# Supplementary material for: Response to FEC Chemotherapy and Oncolytic HSV-1 Is Associated with Macrophage Polarization and Increased Expression of S100A8/A9 in Triple Negative Breast Cancer
Source: MDPI journal article supplement (doi:10.3390/cancers13215590), 2021-11-08
Supplement: s1 [file s1]

Supplementary Materials:

# Response to FEC Chemotherapy and Oncolytic HSV-1 Is Associated with Macrophage Polarization and Increased Expression of S100A8/A9 in Triple Negative Breast Cancer

Alyssa Vito, Nader El-Sayes, Omar Salem, Yonghong Wan and Karen L. Mossman

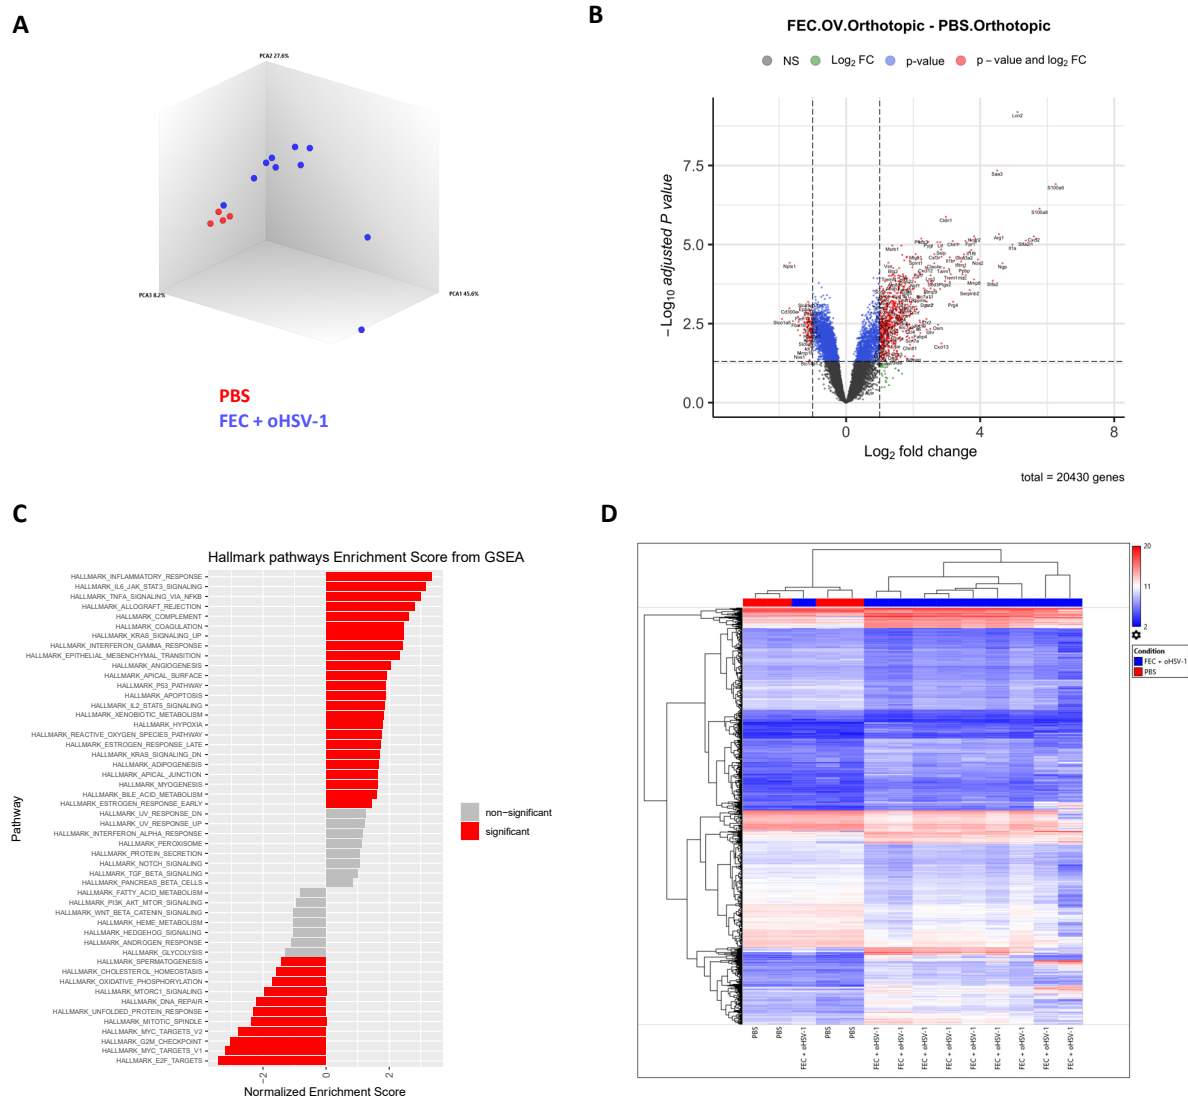

**Figure S1.** FEC + oHSV-1 therapy upregulates many immune pathways and processes in orthotopic E0771 tumors. C57/Bl6 mice bearing E0771 orthotopic tumors were treated with either PBS or FEC + oHSV-1. Tumors were harvested on day 5, and RNA was extracted from whole tumor digests and sent for sequencing. (A) A 3-D cluster plot showing the RNA expression correlations between mice treated with PBS (blue;  $n = 5$ ) and FEC + oHSV-1 (red;  $n = 10$ ). (B) Volcano plot showing differentially expressed genes between tumors treated with FEC + oHSV-1 and PBS. (C) Heat map showing the normalized expression values of genes across all samples. (D) Bar plot illustrating the results of hallmark pathway enrichment analysis performed on samples from mice treated with FEC + oHSV-1 compared to those treated with PBS alone.

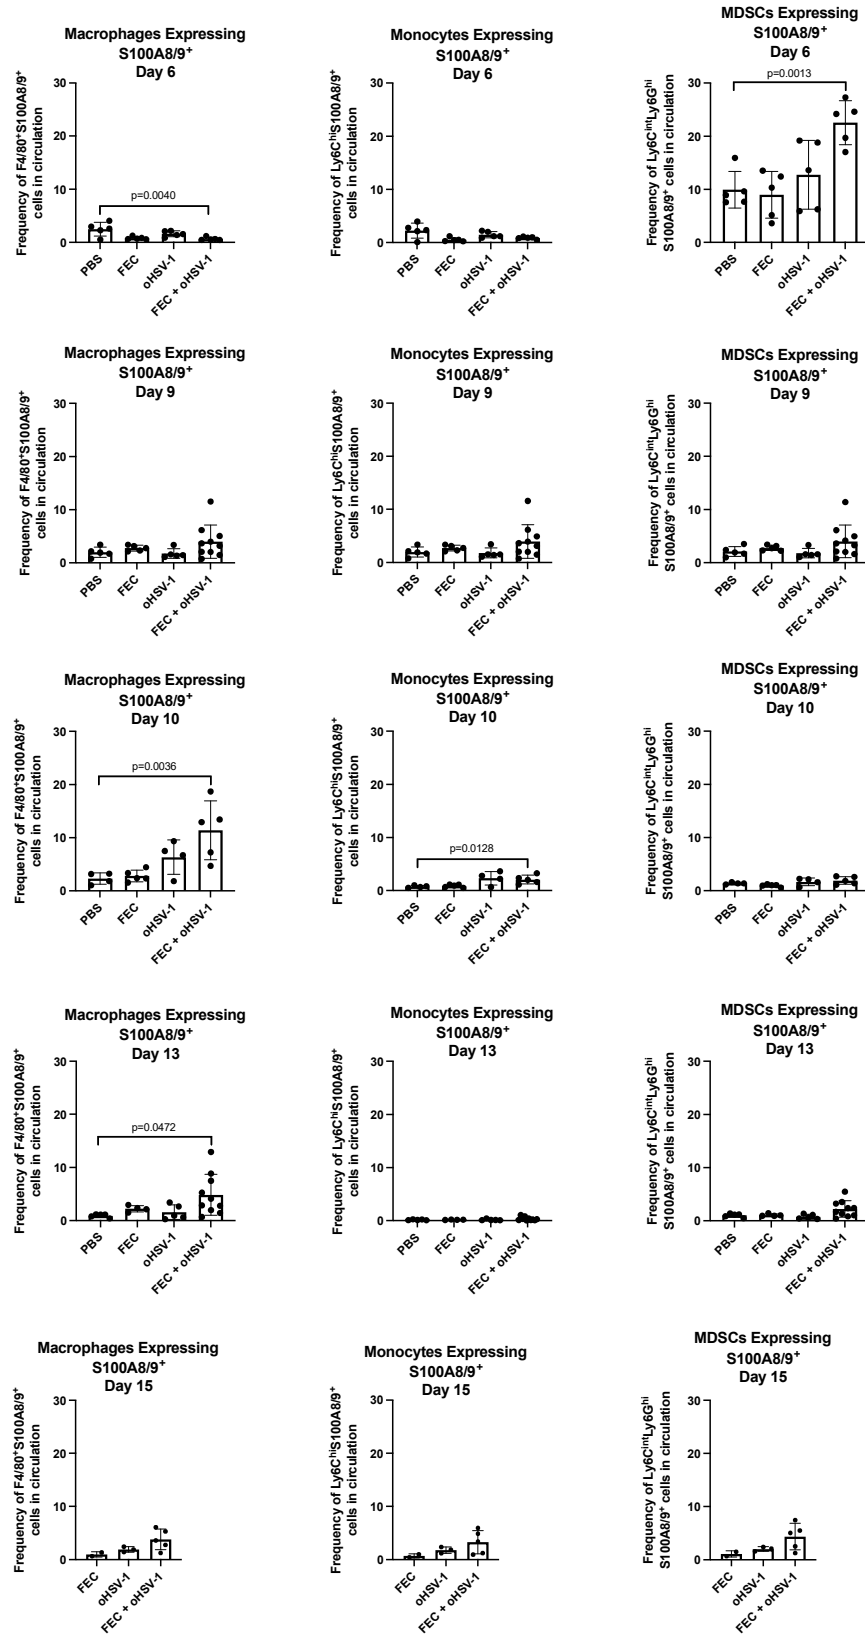

**Figure S2.** FEC + oHSV-1 increases circulating levels of S100A8/A9. C57/Bl6 mice bearing E0771 tumors were treated with PBS ( $n = 5$ ), FEC ( $n = 5$ ), oHSV-1 ( $n = 5$ ), or FEC + oHSV-1 ( $n = 5-10$ ). Blood was drawn on days 6, 9, 10, 13, and 15 and was analyzed via flow cytometry. Bar plots showing the frequencies of F4/80<sup>+</sup>S100A9<sup>+</sup>, Ly6C<sup>+</sup>S100A9<sup>+</sup>, and Ly6C<sup>+</sup>Ly6G<sup>+</sup>S100A9<sup>+</sup> cells in circulating PBMCs. Dots are representative of individual mice. Error bars are representative of the standard deviation. ANOVA test was used for statistical analyses.

**Table S1.** Differentially expressed genes associated with B cell pathways

Values are representative of fold change. \*F = FEC, O = oHSV-1, P = PBS, BCR = B cell receptor, KEGG = Kyoto Encyclopedia of Genes and Genomes, Sino = Sino Biological

| Gene    | F + O vs. P (subcutaneous) | F + O vs. P (orthotopic) | Function/Pathway                                                                                                                     |
|---------|----------------------------|--------------------------|--------------------------------------------------------------------------------------------------------------------------------------|
| Ifitm1  | 27.2                       | 153.08                   | BCR signaling pathway (KEGG)                                                                                                         |
| Il1b    | 29.58                      | 69.68                    | BCR signaling pathway (Sino)                                                                                                         |
| CD24a   | 4.38                       | 42.13                    | B cell development pathway                                                                                                           |
| CXCL12  | 3.63                       | 28.46                    | BCR signaling pathway (Sino)                                                                                                         |
| Nrg1    | 2.91                       | 8.17                     | Downstream signaling events of BCR                                                                                                   |
| Fgf7    | 2.72                       | 8.7                      | Downstream signaling events of BCR                                                                                                   |
| Slamf6  | 3.63                       | 3.4                      | BCR signaling pathway (Sino)                                                                                                         |
| Il21r   | --                         | 3.06                     | B cell development pathway                                                                                                           |
| Cd22    | 4.38                       | --                       | BCR signaling pathway (Sino + KEGG)<br>Downstream signaling events of BCR<br>Antigen activation of BCR<br>B cell development pathway |
| Rac2    | 4.85                       | 13.91                    | BCR signaling pathway (Sino + KEGG)                                                                                                  |
| Fcgr2b  | 4.45                       | 10.17                    | BCR signaling pathway (Sino + KEGG)                                                                                                  |
| Dok3    | --                         | 4.22                     | BCR signaling pathway (Sino)                                                                                                         |
| Creb3l1 | 2.9                        | 8.07                     | BCR signaling pathway (Sino)                                                                                                         |
| Cd3e    | 2.16                       | --                       | BCR signaling pathway (Sino)<br>B cell development pathway                                                                           |
| Ptpn22  | --                         | 2.14                     | BCR signaling pathway (Sino)                                                                                                         |
| Cxcr4   | 3.27                       | 8.55                     | B cell development pathway                                                                                                           |
| Btk     | 2.12                       | 3.1                      | BCR signaling pathway (Sino)<br>Antigen activation of BCR                                                                            |
| Mef2c   | 2.12                       | --                       | BCR signaling pathway (Sino + KEGG)                                                                                                  |
| Cd80    | 3.98                       | 5.17                     | B cell development pathway<br>Downstream signaling events of BCR                                                                     |
| Fos     | --                         | 3.63                     | BCR signaling pathway (Sino + KEGG)                                                                                                  |
| Adgre4  | --                         | 2.09                     | BCR signaling pathway (Sino)                                                                                                         |
| Lcp2    | 2.88                       | 6.28                     | BCR signaling pathway (Sino)<br>Antigen activation of BCR                                                                            |
| Cd3d    | 2.23                       | 3.31                     | BCR signaling pathway (Sino)                                                                                                         |
| Cyp7b1  | --                         | 2.24                     | BCR signaling pathway (Sino)                                                                                                         |
| Adap2   | 2.71                       | 4.28                     | BCR signaling pathway (Sino)                                                                                                         |
| Lat     | --                         | 2.08                     | BCR signaling pathway (Sino)<br>Antigen activation of BCR                                                                            |
| Ptpn22  | 3.47                       | 7.16                     | BCR signaling pathway (Sino + KEGG)<br>B cell development pathway                                                                    |
| Cd84    | 2.66                       | 6.28                     | B cell development pathway                                                                                                           |
| Egr1    | --                         | 3.58                     | BCR signaling pathway (Sino)                                                                                                         |
| Pag1    | --                         | 2.2                      | BCR signaling pathway (KEGG)                                                                                                         |
| Lilra6  | --                         | 2.45                     | BCR signaling pathway (KEGG)                                                                                                         |
| Pik3cg  | 2.66                       | 4.02                     | BCR signaling pathway (KEGG)                                                                                                         |
| Plcg2   | 2.12                       | 3.85                     | BCR signaling pathway (KEGG)<br>Downstream signaling events of BCR<br>Antigen activation of BCR                                      |
| Icos    | --                         | 4.45                     | B cell development pathway<br>Downstream signaling events of BCR                                                                     |
| Il4ra   | 2.95                       | 8.86                     | B cell development pathway                                                                                                           |
| Syk     | 2.44                       | 8.71                     | BCR signaling pathway (Sino + KEGG)<br>Antigen activation of BCR                                                                     |
| Rassf5  | --                         | 3.85                     | BCR signaling pathway (Sino)                                                                                                         |
| Rasgrp1 | 2.39                       |                          | Downstream signaling events of BCR                                                                                                   |

|         |      |       |                                                                                                        |
|---------|------|-------|--------------------------------------------------------------------------------------------------------|
| Il10ra  | 2.9  | 2.72  | B cell development pathway                                                                             |
| Il7r    | 2.84 | 4.88  | B cell development pathway                                                                             |
| Cd69    | 2.38 | --    | B cell development pathway                                                                             |
| Cd81    | --   | 3.26  | B cell receptor signaling pathway (KEGG)                                                               |
| Ptpn6   | 2.26 | 6.29  | BCR signaling pathway (Sino + KEGG)<br>Downstream signaling events of BCR<br>Antigen activation of BCR |
| Vav3    | --   | 2.68  | BCR signaling pathway (KEGG)<br>Antigen activation of BCR                                              |
| Cd1d1   | --   | 2.57  | B cell development pathway                                                                             |
| Cd86    | --   | 2.21  | B cell development pathway<br>Downstream signaling events of BCR                                       |
| Prkcb   | 3.15 | 12.45 | BCR signaling pathway (Sino + KEGG)<br>Downstream signaling events of BCR                              |
| Cd48    | 2.27 | 2.55  | B cell development pathway                                                                             |
| Thy1    | --   | 3.89  | B cell development pathway                                                                             |
| Vav1    | 2.35 | 5.33  | BCR signaling pathway (Sino + KEGG)<br>Antigen activation of BCR<br>Downstream signaling events of BCR |
| Pik3ap1 | 2.61 | 4.55  | BCR signaling pathway (KEGG)<br>Downstream signaling events of BCR<br>Antigen activation of BCR        |
| Prkch   | --   | 3.84  | BCR signaling pathway (Sino)                                                                           |
| Pax5    | 2.7  | --    | B cell development pathway                                                                             |
| Hcls1   | --   | 4.98  | BCR signaling pathway (KEGG)                                                                           |
| Cd34    | --   | 2.52  | B cell development pathway                                                                             |
| Nfatc2  | --   | 2.16  | BCR signaling pathway (KEGG)<br>Antigen activation of BCR                                              |
| Nfkbia  | 3.44 | 7.84  | BCR signaling pathway (Sino + KEGG)<br>Downstream signaling events of BCR                              |
| Hgf     | --   | 3.92  | Downstream signaling events of BCR                                                                     |
| Rps6ka1 | 2.23 | 2.9   | BCR signaling pathway (KEGG)                                                                           |
| Lat2    | --   | 2.55  | BCR signaling pathway (Sino + KEGG)                                                                    |
| Pik3cd  | --   | 2.65  | BCR signaling pathway (KEGG)<br>Downstream signaling events of BCR<br>Antigen activation of BCR        |
| Kit     | --   | 3.27  | B cell development pathway<br>Downstream signaling events of BCR                                       |
| Malt1   | --   | 2.17  | BCR signaling pathway (Sino + KEGG)<br>Downstream signaling events of BCR                              |
| Ikbke   | --   | 3.74  | BCR signaling pathway (Sino)                                                                           |
